# Supplementary material
Source: publisher site journal article supplement (https://www.dovepress.com/article/350038)
Supplement: Supplementary file 1 [file get_supplementary_file.php]

**Supplementary Table 1S - Participating public hospitals**

| **Hospital** | **N (%)** |
| --- | --- |
| Hospital Guillermo Almenara | 22 (1.5) |
| Hospital II de EsSalud Cajamarca | 40 (2.7) |
| Hospital Regional de Cajamarca | 10 (0.7) |
| Hospital Regional de Chimbote | 17 (1.2) |
| Hospital Daniel A. Carrión | 27 (1.8) |
| Hospital Dos de Mayo | 70 (4.8) |
| Hospital Goyeneche | 45 (3.1) |
| Hospital Militar Central | 19 (1.3) |
| Instituto Nacional de Enfermedades Neoplásicas | 383 (26.0) |
| Instituto Regional de Enfermedades Neoplásicas (IREN NORTE) | 121 (8.2) |
| Instituto Regional de Enfermedades Neoplásicas del Sur (IREN SUR) | 221 (15.0) |
| Centro Oncológico de Lamas – Hospital de Lamas II-E | 25 (1.7) |
| Hospital Regional de Lambayeque | 104 (7.1) |
| Hospital Edgardo Rebagliati Martins | 119 (8.1) |
| Hospital Alberto Sabogal | 91 (6.2) |
| Hospital Santa Rosa | 79 (5.4) |
| Hospital II Santa Rosa Perú – Corea | 54 (3.7) |
| Hospital de EsSalud Trujillo | 25 (1.7) |
| Total | 1472 (100.0) |

**Supplementary Table S2: STROBE Statement—Checklist of items that should be included in reports of *cross-sectional studies***

|  | Item No | Recommendation | Page No |
| --- | --- | --- | --- |
| **Title and abstract** | 1 | (*a*) Indicate the study’s design with a commonly used term in the title or the abstract | 1 |
| (*b*) Provide in the abstract an informative and balanced summary of what was done and what was found | 4 |
| Introduction | | | |
| Background/rationale | 2 | Explain the scientific background and rationale for the investigation being reported | 5 |
| Objectives | 3 | State specific objectives, including any prespecified hypotheses | 5 |
| Methods | | | |
| Study design | 4 | Present key elements of study design early in the paper | 6 |
| Setting | 5 | Describe the setting, locations, and relevant dates, including periods of recruitment, exposure, follow-up, and data collection | 6 |
| Participants | 6 | (*a*) Give the eligibility criteria, and the sources and methods of selection of participants | 6 |
| Variables | 7 | Clearly define all outcomes, exposures, predictors, potential confounders, and effect modifiers. Give diagnostic criteria, if applicable | 6 |
| Data sources/ measurement | 8 | For each variable of interest, give sources of data and details of methods of assessment (measurement). Describe comparability of assessment methods if there is more than one group | 7 |
| Bias | 9 | Describe any efforts to address potential sources of bias | 8 |
| Study size | 10 | Explain how the study size was arrived at | 8 |
| Quantitative variables | 11 | Explain how quantitative variables were handled in the analyses. If applicable, describe which groupings were chosen and why | 8 |
| Statistical methods | 12 | (*a*) Describe all statistical methods, including those used to control for confounding | 8 |
| (*b*) Describe any methods used to examine subgroups and interactions | 8 |
| (*c*) Explain how missing data were addressed | NA |
| (*d*) If applicable, describe analytical methods taking account of sampling strategy | NA |
| (*e*) Describe any sensitivity analyses | 8,9 |
| Results | | | |
| Participants | 13 | (a) Report numbers of individuals at each stage of study—eg numbers potentially eligible, examined for eligibility, confirmed eligible, included in the study, completing follow-up, and analysed | 8 |
| (b) Give reasons for non-participation at each stage | 8,22 |
| (c) Consider use of a flow diagram | 21 |
| Descriptive data | 14 | (a) Give characteristics of study participants (eg demographic, clinical, social) and information on exposures and potential confounders | 9,22 |
| (b) Indicate number of participants with missing data for each variable of interest | 22 |
| Outcome data | 15 | Report numbers of outcome events or summary measures | 9-11 |
| Main results | 16 | (*a*) Give unadjusted estimates and, if applicable, confounder-adjusted estimates and their precision (eg, 95% confidence interval). Make clear which confounders were adjusted for and why they were included | 10,11 |
| (*b*) Report category boundaries when continuous variables were categorized | NA |
| (*c*) If relevant, consider translating estimates of relative risk into absolute risk for a meaningful time period | NA |
| Other analyses | 17 | Report other analyses done—eg analyses of subgroups and interactions, and sensitivity analyses | 10,11 |
| Discussion | | | |
| Key results | 18 | Summarise key results with reference to study objectives | 11-14 |
| Limitations | 19 | Discuss limitations of the study, taking into account sources of potential bias or imprecision. Discuss both direction and magnitude of any potential bias | 14 |
| Interpretation | 20 | Give a cautious overall interpretation of results considering objectives, limitations, multiplicity of analyses, results from similar studies, and other relevant evidence | 14,15 |
| Generalisability | 21 | Discuss the generalisability (external validity) of the study results | 14,15 |
| Other information | | | |
| Funding | 22 | Give the source of funding and the role of the funders for the present study and, if applicable, for the original study on which the present article is based | NA |

NA: Not Applicable

| Name: | | ID: |
| --- | --- | --- |
| Hospital of origin: | | Medical Record ID: |
| Residence: | Call Date: CODE: | |
|  |  |  |

| **REGARDING CANCER** | | | | | | | | | | | | | | | | | |
| --- | --- | --- | --- | --- | --- | --- | --- | --- | --- | --- | --- | --- | --- | --- | --- | --- | --- |
| What is your diagnosis? | |  | | | | | | | Diagnosis Date: | | | |  | Early |  | Advanced | | --- | --- | --- | --- | | | | | | |
|  | | | | | | | | | | | | | | | | | |
| **CANCER TREATMENT** | | | | | | | | | | | | | | | | | |
|  | | | | | | | | | | | | | | | | | |
| 1.- What is your cancer clinical status? In remission ___  In response ___   In progression______ | | | | | | | | | | | | | | | | | |
| 2.- What treatment do you receive? | | | | | | | | | | | | | | | | | |
| Follow-up___ | | Chemotherapy___ | | | | Hormone therapy_____ | | | | Target/ Immune Therapy ____ | | | | | Surgery_____ | | |
| Last date of treatment/follow-up: | | | | | |  | | | | | | | | | | | |
|  | | | | | | | | | | | | | | | | | |
| **DURING THE COVID PANDEMIC** | | | | | | | | | | | | | | | | | |
|  | | | | | | | | | | | | | | | | | |
| 3.- Have you attended your medical appointments in a regular way? | | | | | | | | | | | | | | | | | |
| Yes | No | | If you marked yes | | | | | Have you receive cancer treatment in private center? | | | | | | | | Yes | |
| No | |
| 4.- If your answer is NO, what was the reason? | | | | | | | | | | | | | | | | | |
| I could not travel to hospital____ | | Your hospital was not attending_____ | | | Fear of COVID-19____ | | | | | | The date of appointment was changed_________ | | |  | | |  |
| Last appointment date (specify) | |  | | | | | | | | | | | | | | | |
|  | | | | | | | | | | | | | | | | | |
| **REGARDING COVID-19** | | | | | | | | | | | | | | | | | |
|  | | | | | | | | | | | | | | | | | |
| 5.- Have you had COVID-19 disease? | | | | | | | | | | | | | | | | | |
| No | | Yes | | Do you have symptoms without confirmatory test? | | | | | | | | | Yes | | | | No |
| What test (PCR SARS-CoV-2/ rapid antigen/ antibody serology test) did you take? | | | | | | |  | | | | | | | | | | |
| Cause of death:  Date of death: | | | | | | | | | | | | | | | | | |

**Supplementary Figure S1: Questionnaire**
